# Supplementary material for: Hair Growth Promoting Effects of 650 nm Red Light Stimulation on Human Hair Follicles and Study of Its Mechanisms via RNA Sequencing Transcriptome Analysis
Source: PubMed Central journal article supplement — Ann Dermatol. 2021 Nov 4;33(6):553–61. doi: 10.5021/ad.2021.33.6.553 (PMC8577899; doi:10.5021/ad.2021.33.6.553), 2021-11-04
Supplement: ad-33-553-s001.pdf [file ad-33-553-s001.pdf]

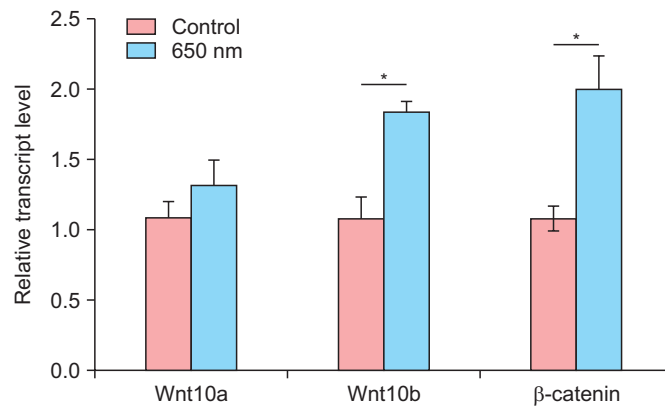

**Supplementary Fig. 1.** The mRNA levels of related genes were detected by Real-time PCR in hair follicles treated with or without 650-nm light.
